# Supplementary material
Source: PubMed Central journal article supplement (PMC2528079)
Supplement: pp.108.124875_1.pdf [file pp.108.124875_1.pdf]

**Suppl Table 1. Summary of stress tolerance of the different lines**

| <b>Locus</b> |                                                    | <b>Annotation</b> | <b>Molecular weight of fusion protein (kD)</b> | <b>t-butyl</b> | <b>Paraquat</b> | <b>Osmotic</b> | <b>Salinity</b> | <b>Heat</b> | <b>Cold</b> | <b>ABA</b> |
|--------------|----------------------------------------------------|-------------------|------------------------------------------------|----------------|-----------------|----------------|-----------------|-------------|-------------|------------|
| AT2G41650    | Unknown (POF)                                      |                   | 53.5                                           | Yellow         | Yellow          | Yellow         | Yellow          | Yellow      | Yellow      | Yellow     |
| AT4G17070    | Unknown (POF)                                      |                   | 72.5                                           | Yellow         | Red             | Yellow         | Yellow          | Yellow      | Red         | Yellow     |
| AT1G32220    | Contain NAD-dependent epimerase/dehydratase        |                   | 78                                             | Red            | Yellow          | Yellow         | Yellow          | Yellow      | Yellow      | Yellow     |
| AT5G19875    | Unknown (POF)                                      |                   | 60.4                                           | Yellow         | Red             | Yellow         | Yellow          | Yellow      | Yellow      | Blue       |
| AT5G27830    | Unknown (POF)                                      |                   | 79                                             | Yellow         | Red             | Red            | Yellow          | Yellow      | Yellow      | Yellow     |
| AT5G59080    | Unknown (POF)                                      |                   | 61                                             | Red            | Red             | Yellow         | Yellow          | Yellow      | Yellow      | Yellow     |
| AT5G50350    | Unknown (POF)                                      |                   | 110                                            | Red            | Red             | Yellow         | Yellow          | Yellow      | Yellow      | Yellow     |
| AT5G43750    | Unknown (POF)                                      |                   | 70                                             | Red            | Red             | Yellow         | Yellow          | Yellow      | Yellow      | Yellow     |
| AT5G18040    | Unknown (POF)                                      |                   | 74.7                                           | Red            | Red             | Yellow         | Yellow          | Yellow      | Yellow      | Blue       |
| AT3G60980    | Contain pentatricopeptide repeat domain            |                   | 93.5                                           | Red            | Red             | Yellow         | Yellow          | Yellow      | Yellow      | Yellow     |
| AT3G51610    | Unknown (POF)                                      |                   | 72.2                                           | Red            | Red             | Yellow         | Yellow          | Yellow      | Yellow      | Yellow     |
| AT4G12000    | Contain SNARE domain                               |                   | 80.5                                           | Red            | Red             | Yellow         | Yellow          | Yellow      | Yellow      | Yellow     |
| AT4G08940    | Contain Ubiquitin hydrolase domain                 |                   | 92.7                                           | Blue           | Red             | Yellow         | Yellow          | Yellow      | Red         | Yellow     |
| AT1G72060    | Contain serine-type endopeptidase inhibitor domain |                   | 54.8                                           | Blue           | Red             | Yellow         | Yellow          | Yellow      | Yellow      | Yellow     |
| AT3G23910    | Unknown (POF)                                      |                   | 95                                             | Blue           | Red             | Yellow         | Yellow          | Yellow      | Yellow      | Yellow     |
| AT3G14430    | Unknown (POF)                                      |                   | 55.2                                           | Blue           | Red             | Yellow         | Yellow          | Yellow      | Red         | Yellow     |
| AT3G20340    | Unknown (POF)                                      |                   | 59.6                                           | Blue           | Red             | Yellow         | Yellow          | Yellow      | Red         | Yellow     |
| AT3G16670    | Unknown (POF)                                      |                   | 62                                             | Yellow         | Red             | Yellow         | Yellow          | Yellow      | Yellow      | Yellow     |
| AT3G08670    | Unknown (POF)                                      |                   | 106                                            | Red            | Red             | Yellow         | Yellow          | Red         | Red         | Yellow     |
| AT3G10020    | Unknown (POF)                                      |                   | 63                                             | Blue           | Yellow          | Yellow         | Yellow          | Yellow      | Yellow      | Yellow     |
| AT1G13340    | Contain DUF292 domain                              |                   | 91.5                                           | Red            | Red             | Yellow         | Yellow          | Yellow      | Yellow      | Yellow     |
| AT1G19020    | Unknown (POF)                                      |                   | 55                                             | Red            | Red             | Yellow         | Yellow          | Yellow      | Yellow      | Yellow     |
| AT1G64360    | Unknown (POF)                                      |                   | 55.1                                           | Red            | Yellow          | Yellow         | Yellow          | Yellow      | Yellow      | Blue       |
| AT1G52200    | Contain PLAC8 domain                               |                   | 67                                             | Blue           | Red             | Yellow         | Yellow          | Yellow      | Yellow      | Blue       |
| AT1G78410    | Contain VQ motif                                   |                   | 58                                             | Red            | Red             | Yellow         | Yellow          | Yellow      | Yellow      | Blue       |
| AT1G21520    | Unknown (POF)                                      |                   | 53.5                                           | Red            | Red             | Yellow         | Yellow          | Yellow      | Red         | Yellow     |
| AT1G80130    | Unknown (POF)                                      |                   | 80                                             | Red            | Red             | Blue           | Red             | Yellow      | Red         | Yellow     |
| AT1G73120    | Unknown (POF)                                      |                   | 58                                             | Red            | Red             | Yellow         | Yellow          | Yellow      | Yellow      | Yellow     |
| AT1G50170    | Contain Cbix domain                                |                   | 71                                             | Red            | Red             | Yellow         | Blue            | Yellow      | Yellow      | Yellow     |
| AT1G50290    | Unknown (POF)                                      |                   | 62                                             | Red            | Red             | Yellow         | Yellow          | Yellow      | Yellow      | Yellow     |
| AT1G11210    | Contain DUF761 domain                              |                   | 81                                             | Red            | Red             | Yellow         | Yellow          | Yellow      | Yellow      | Red        |
| AT1G14870    | Contain PLAC8 domain                               |                   | 63                                             | Red            | Red             | Yellow         | Yellow          | Yellow      | Yellow      | Yellow     |
| AT2G22080    | Contain zinc finger domain                         |                   | 65                                             | Red            | Red             | Blue           | Yellow          | Yellow      | Blue        | Yellow     |
| AT2G04795    | Unknown (POF)                                      |                   | 56.5                                           | Red            | Red             | Yellow         | Yellow          | Yellow      | Blue        | Yellow     |
| AT2G21195    | Unknown (POF)                                      |                   | 56.5                                           | Red            | Red             | Yellow         | Yellow          | Yellow      | Blue        | Yellow     |
| AT1G27330    | Contain ribosome associated RAMP4 domain           |                   | 53.6                                           | Red            | Red             | Red            | Red             | Yellow      | Blue        | Yellow     |
| AT2G15560    | Contain DUF537 domain                              |                   | 100.4                                          | Red            | Red             | Yellow         | Yellow          | Yellow      | Yellow      | Yellow     |
| AT2G24150    | Contain HlyIII domain                              |                   | 85                                             | Red            | Red             | Red            | Yellow          | Yellow      | Yellow      | Yellow     |
| AT2G19310    | Contain HSP20/alpha crystallin domain              |                   | 64.7                                           | Red            | Red             | Blue           | Red             | Yellow      | Blue        | Yellow     |
| AT2G44240    | Contain DUF239 domain                              |                   | 90.8                                           | Red            | Red             | Blue           | Red             | Yellow      | Blue        | Yellow     |
| AT2G40000    | Contain Hs1pro-1 domain                            |                   | 95.4                                           | Red            | Red             | Blue           | Yellow          | Yellow      | Blue        | Yellow     |

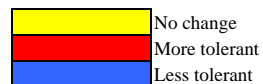

**Suppl Table 2. Primers used for the cloning of the different proteins with unknown function**

| <u>locus</u> | <u>pUni gene</u> | <u>primer</u>                  |                                 |
|--------------|------------------|--------------------------------|---------------------------------|
|              | clone            | forward                        | reverse                         |
| AT2G41650    | S66967           | gagactcgagATGGCGGCAGCGAGCTTG   | gagaactagtGGCTGCTCCATACGCCT     |
| AT4G17070    | U14323           | gagactcgagATGTGTAGTGGCAACGATG  | gagaactagtGAACCGGTTTCTTCTTG     |
| AT1G32220    | U17408           | gagactcgagATGACTTCGTTTCTTAGT   | gagaactagtGCTCTCATTTTTGC        |
| AT5G19875    | U61271           | gagactcgagATGGCTAGATCACCATA    | gagaactagtTTAGCCCCAAACGGGAAC    |
| AT5G27830    | U09971           | gagactcgagATGGGAAGATGTTTAACG   | gagaactagtCCATCAGAGCTTGTCTTCT   |
| AT5G59080    | U11769           | gagactcgagATGGAGGGTAAAGGACG    | gagaactagtCCGTAATAAAGAGAACCTTGC |
| AT5G50350    | U24198           | gagagtcgacATGGCGACTTCTGCTTT    | gagaactagtCCGATCAATGAGCGGCTAC   |
| AT5G43750    | U50098           | gagactcgagATGGCAACGGTCACGAT    | gagaactagtCGTGTGGCGATATCAT      |
| AT5G18040    | U11383           | gagactcgagATGAATATGATTACAGCG   | gagaactagtCCGTTGATAGATAAGCGT    |
| AT3G60980    | U24736           | gagactcgagATGTCTCTGATCGGC      | gagaactagtCCAAAGAGATGGGAGACCTC  |
| AT3G51610    | U24527           | gagactcgagATGGCGGGCATGGCTG     | gagaactagtCCATCCCCCTTGCCAAAT    |
| AT4G12000    | U20042           | gagactcgagATGACTTATCACGAAGA    | gagaactagtTGTAACAACAAAGCTTC     |
| AT4G08940    | U61884           | gagagtcgacATGGCTTGGCTTCGTTTCT  | gagaactagtCCAATTGCTCCATCTG      |
| AT1G72060    | U62101           | gagactcgagATGGTTACATACAAGAT    | gagaactagtTTGCTACAATGGATAGT     |
| AT3G23910    | U19105           | gagagtcgacATGGAAGAAGAAACCCA    | gagaactagtTTTTGGGAGGATTTATT     |
| AT3G14430    | U23423           | gagactcgagATGATCGGGCGACGTGC    | gagaactagtCCAAACGGCCAGATGTCAGA  |
| AT3G20340    | U63078           | gagactcgagATGGGGAATTGTTTAAG    | gagaactagtCCGTTAACTTCTGGTATGCT  |
| AT3G16670    | U22022           | gagactcgagATGGCAGTTATCAAGAA    | gagaactagtATTGTGGGGATAAAACC     |
| AT3G08670    | U61987           | gagactcgagATGAATAGGAATCTCAG    | gagacctaggAGTGGGGCAAATGGCTCT    |
| AT3G10020    | U13057           | gagactcgagATGCAGGCGGTATCAGT    | gagaactagtCGACCGACCAAGCGAGG     |
| AT1G13340    | U51136           | gagactcgagATGGGGAAGAAGCTTGAC   | gagaactagtCCGTATCCACGAACCTGT    |
| AT1G19020    | U11998           | gagactcgagATGAACGGAACATCGTG    | gagaactagtTGTTTGTGTGTGTTTT      |
| AT1G64360    | U61211           | gagactcgagATGTCTTTAGAAAAGT     | gagaactagtCCGTAATTAGGGAAGTGTT   |
| AT1G52200    | U22606           | gagactcgagATGGTCTGTCTACTACT    | gagaactagtTTAGACATATATTGATT     |
| AT1G78410    | U21397           | gagactcgagATGTCTGGAAGAGGGAA    | gagaactagtccATATTCTGACCATAGT    |
| AT1G21520    | U50590           | gagactcgagATGAGCTCCGGAGAACT    | gagaactagtccGTAGCGAGTGGGATACA   |
| AT1G80130    | U09684           | gagagtcgacATGTTATTGAGAAGCA     | gagaactagtGATGATGCGGTAATAGA     |
| AT1G73120    | U60254           | gagactcgagATGGCGACTTCTACCTT    | gagaactagtGAGAACCAATTAACGA      |
| AT1G50170    | U20498           | gagactcgagATGACGACTCAGTCGCA    | gagaactagtGAACTATTGTAGAGC       |
| AT1G50290    | U14460           | gagactcgagATGAAGGAGATTAATTTTG  | gagaactagtGAGATTTGGCAAAAAC      |
| AT1G11210    | U13249           | gagactcgagATGGCGTCTGTGGATGAAAG | gagaactagtccATAAGAAAGACCATGAC   |
| AT1G14870    | U24063           | gagactcgagATGGAAGCTCAACACCT    | gagaactagtCGGGTCATGCCGCCT       |
| AT2G22080    | U61331           | gagactcgagATGGAGTTGAAAGAACA    | gagaactagtTTCTTCTCTTCTTTGG      |
| AT2G04795    | U12390           | gagactcgagATGCTCAAGATGTTGTC    | gagaactagtccCATTAAAGAGAGCGTATC  |
| AT2G21195    | U23029           | gagactcgagATGGAACCGCCGGCCACCG  | gagaactagtccATCCAACACATTTGATT   |
| AT1G27330    | U22724           | gagactcgagATGACAACCTCAAAAAG    | agagtctagaGCCATTCTCCACTA        |
| AT2G15560    | U61937           | gagactcgagATGATACAAAACGCT      | gagaactagtACCGGGCTGATGAGTTT     |
| AT2G24150    | U10208           | gagactcgagATGAAGAGACGAAGATCGG  | gagaactagtccAAACCCACAAGAAGGGG   |
| AT2G19310    | U18059           | gagagtcgacATGTGATGATTCCGAT     | gagaactagtccATCATCATCGCCGGTG    |
| AT2G44240    | U14883           | gagactcgagATGATGGGAGTGGCCG     | agagtctagaGGGCATTTAACGTTCT      |
| AT2G40000    | U10524           | gagactcgagATGGTTGATATGGATTG    | gagaactagtCCCAAATGACTCCAAA      |

A

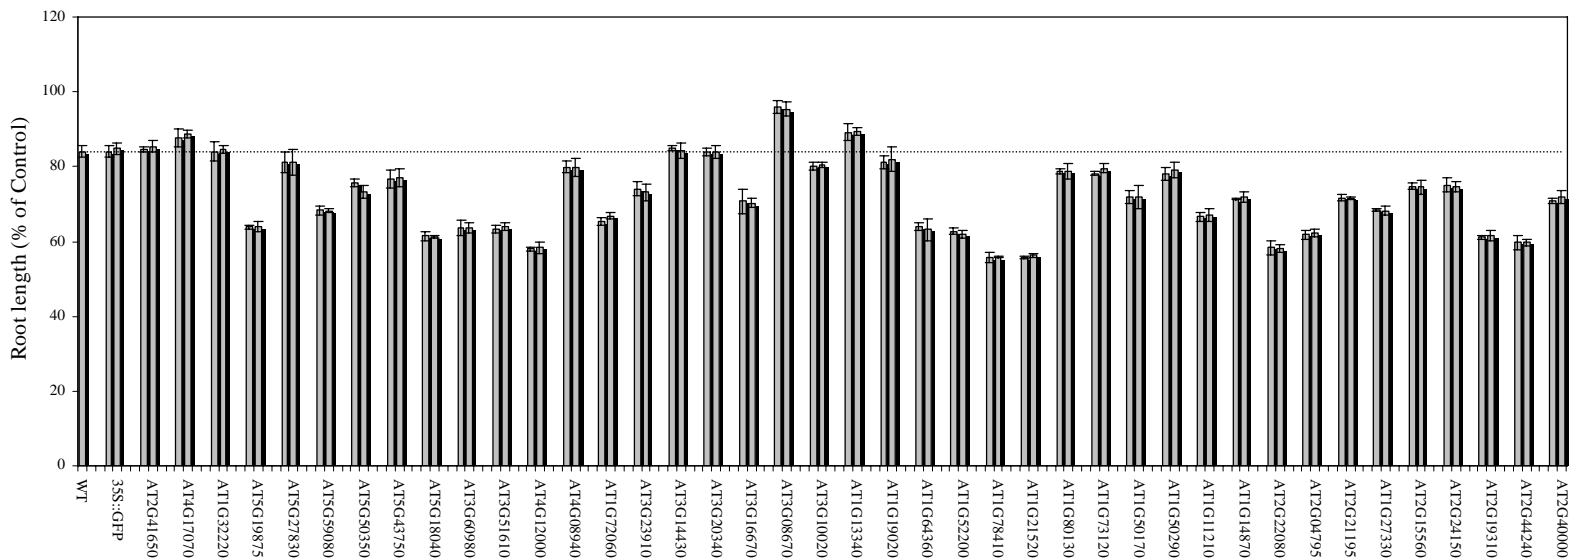

B

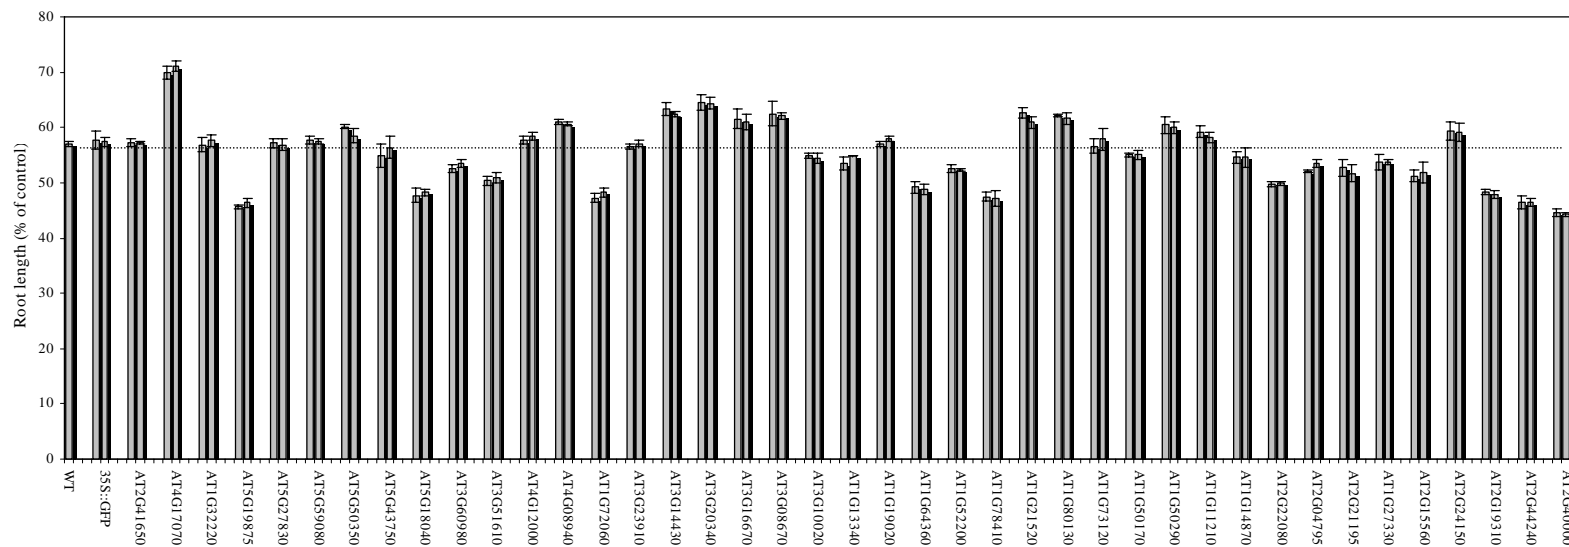

**Supplementary Figure 1.** Effect of **A.** Heat (38°C, 24 hr), or **B.** Cold (4°C, 48 hr) on root elongation of transgenic plants expressing genes of unknown function. All seeds germinated at the same time. Please see method section for experimental details.

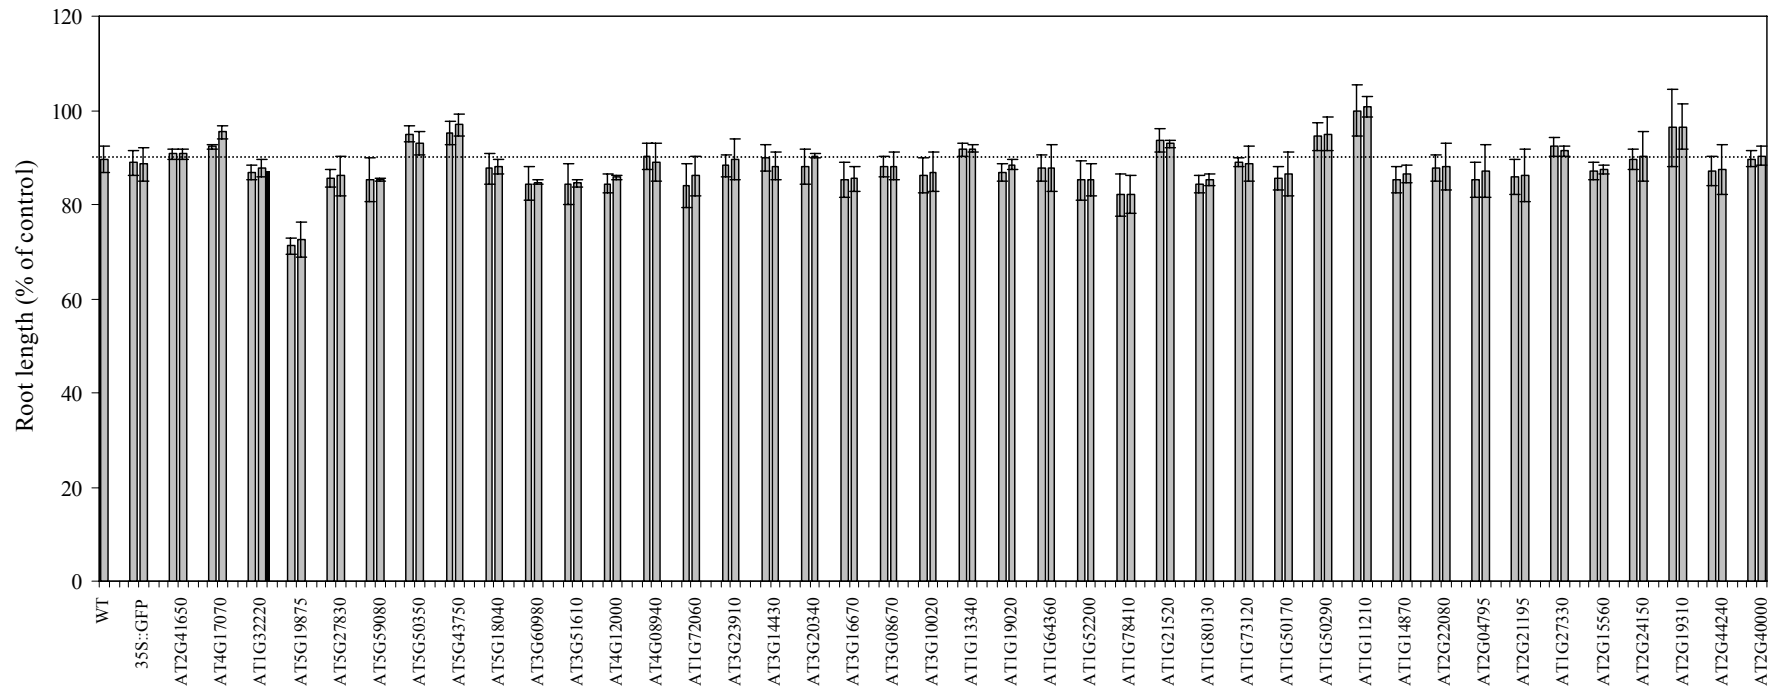

**Supplementary Figure 2.** Effect of ABA (0.5  $\mu$ M) on root elongation of transgenic plants expressing genes of unknown function. All seeds germinated at the same time. Please see method section for experimental details.

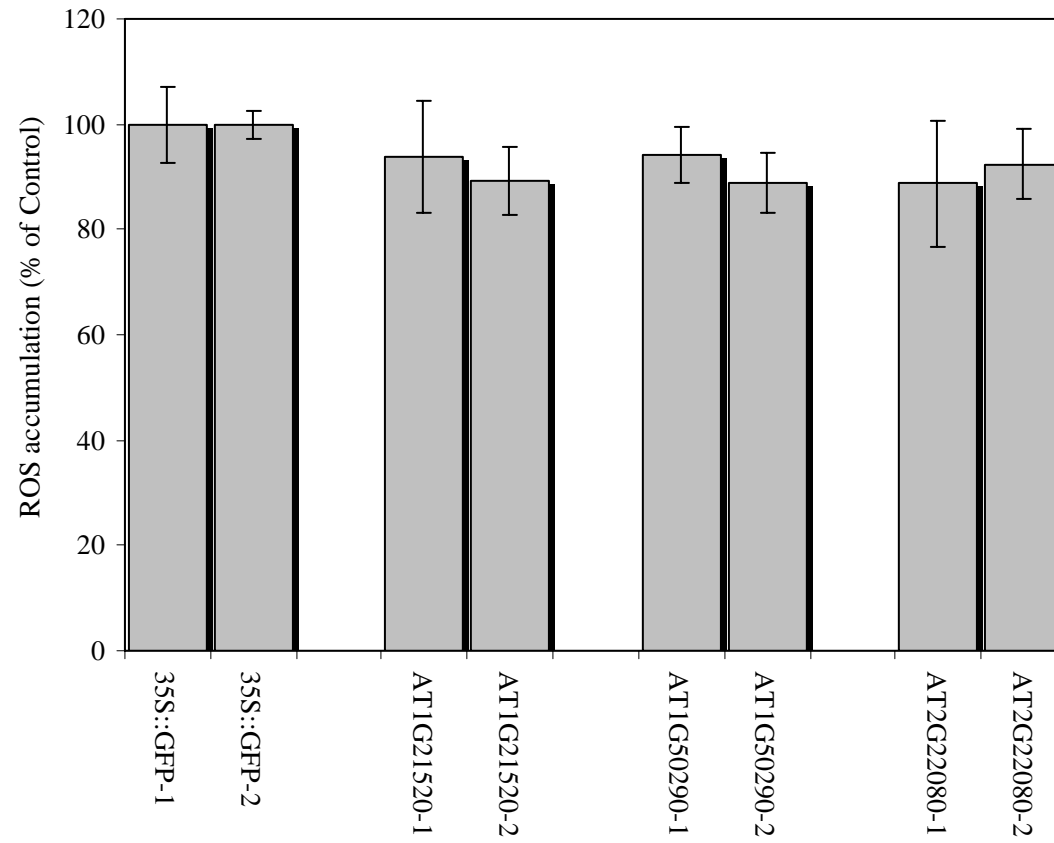

**Supplementary Figure 3.** Accumulation of hydrogen peroxide in roots of 5-day-old seedlings grown on 0.5XMS agar plates under controlled growth conditions

**Supplementary Figure 4.** Yeast growth assays performed with wild type (WT) Yap1 mutants and Yap1 Mutants transformed with different Arabidopsis genes grown on plates containing paraquat or t-butyl hydroperoxide.

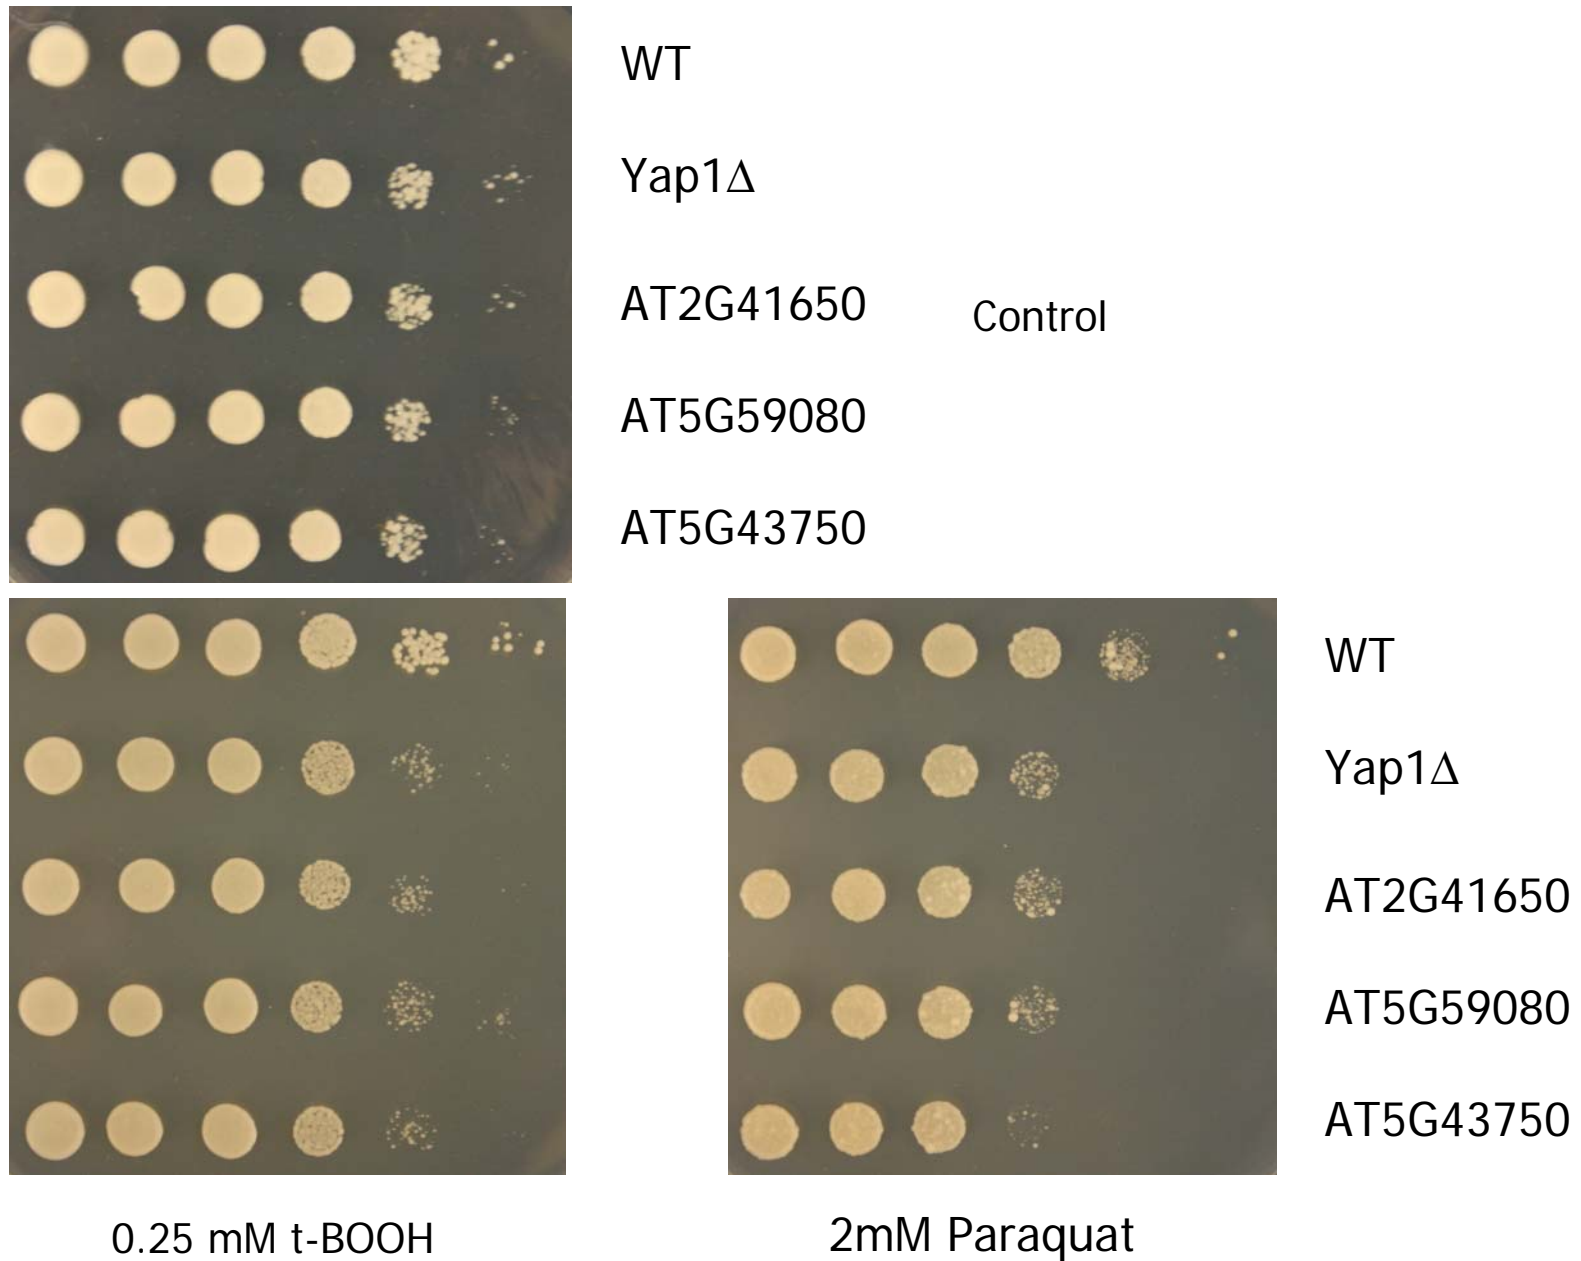

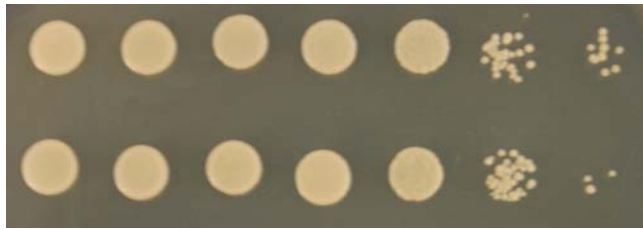

WT

Yap1Δ

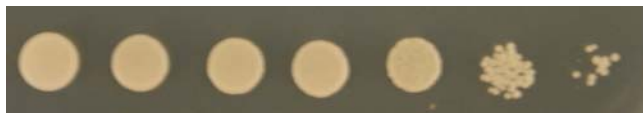

AT3G51610

Control

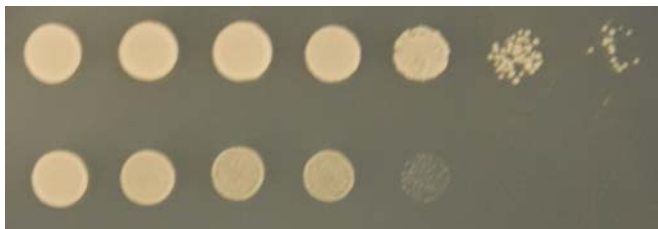

0.25 mM t-BOOH

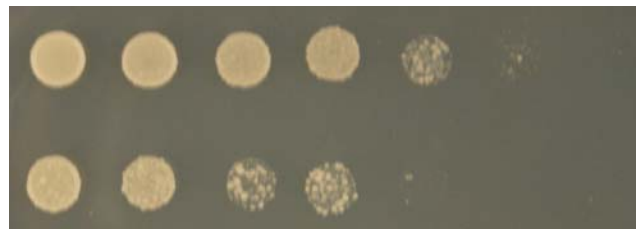

WT

Yap1Δ

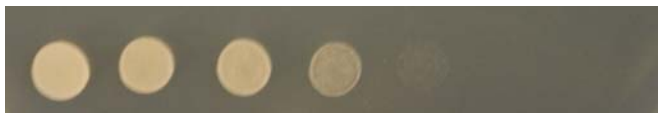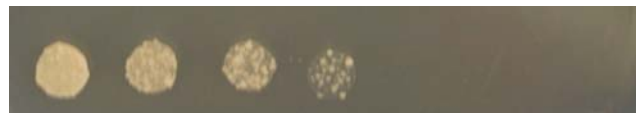

AT3G51610

2mM Paraquat

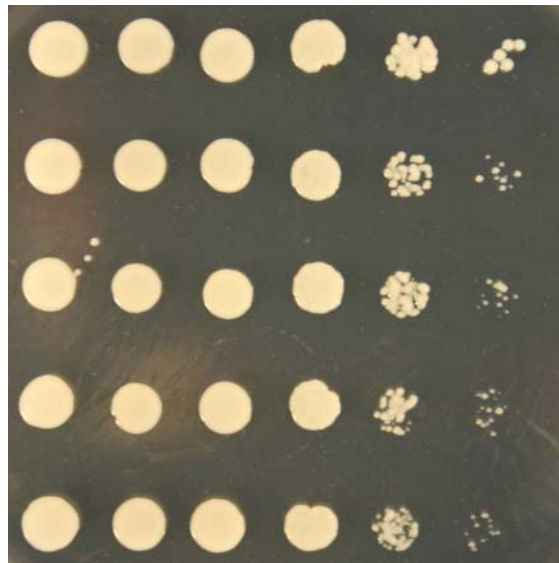

WT

Yap1Δ

AT5G18040

AT3G30300

AT1G50170

Control

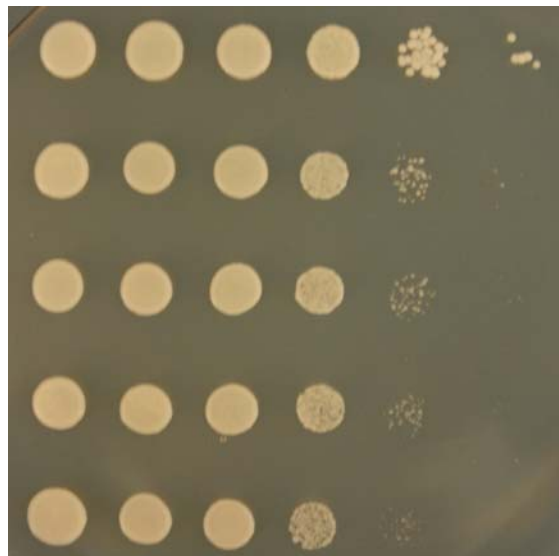

0.25 mM t-BOOH

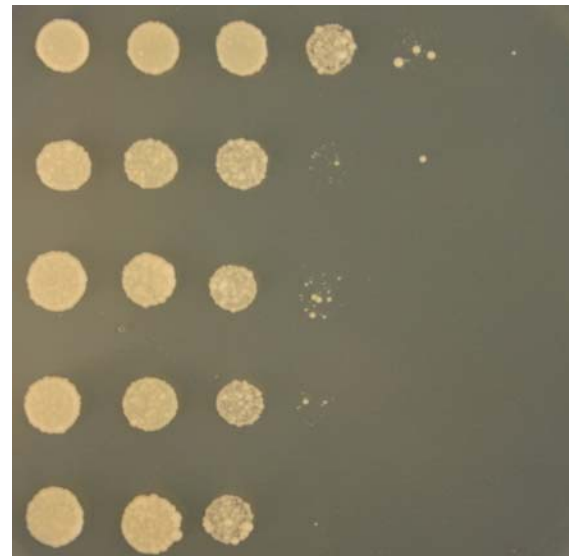

2mM Paraquat

WT

Yap1Δ

AT5G18040

AT3G30300

AT1G50170



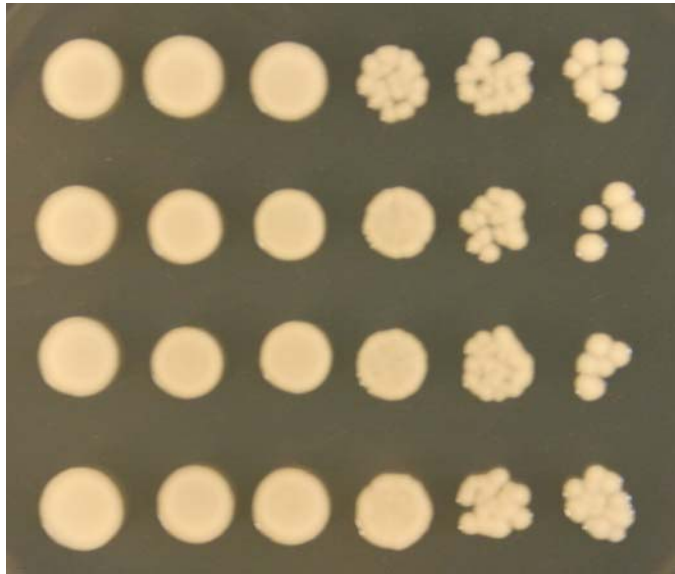

WT

Yap1Δ

AT5G19875

AT3G43520

Control

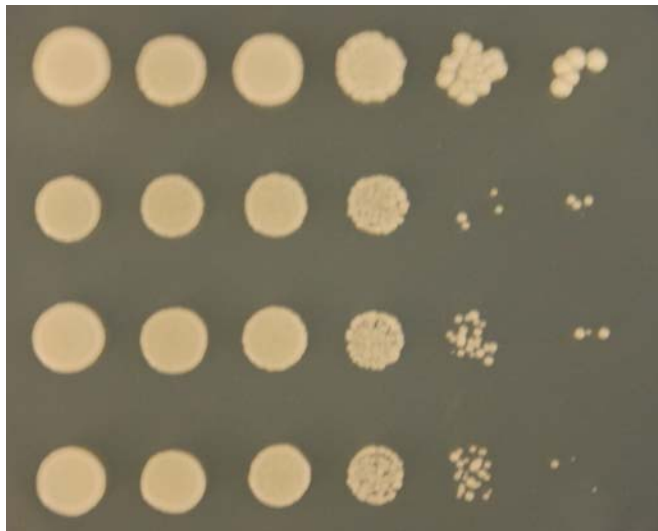

0.25 mM t-BOOH

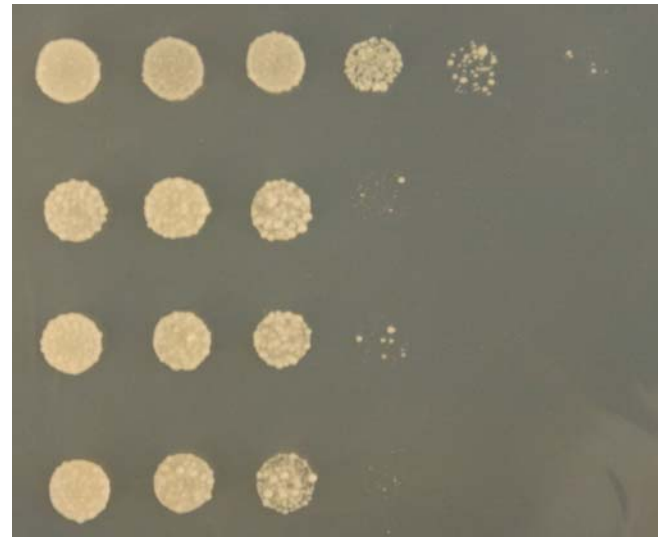

WT

Yap1Δ

AT5G19875

AT3G43520

2mM Paraquat

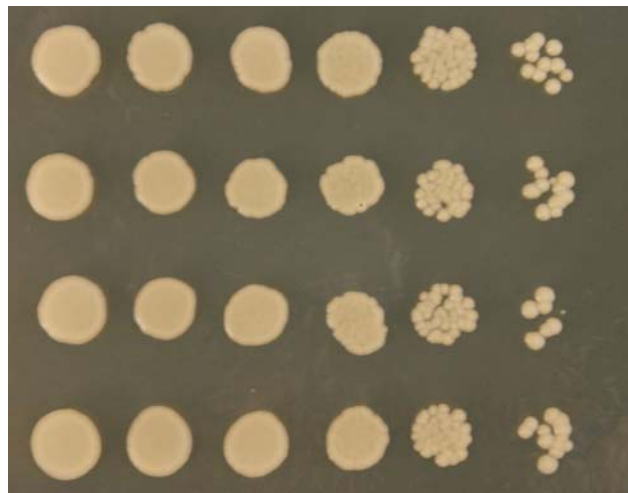

WT

Yap1 $\Delta$

AT4G12000

AT1G72060

Control

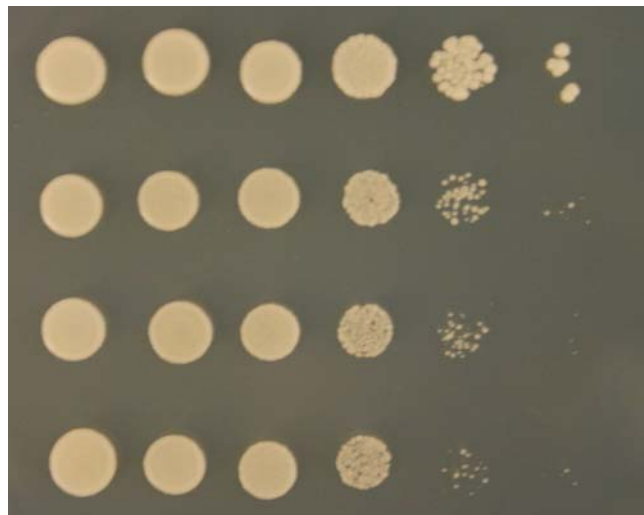

0.25 mM t-BOOH

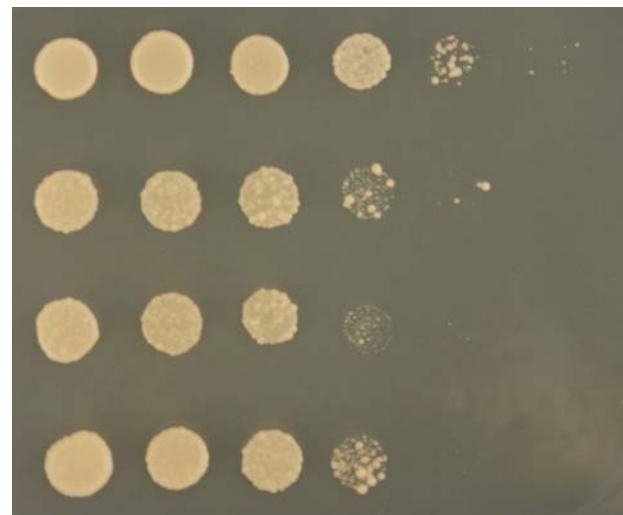

WT

Yap1 $\Delta$

AT4G12000

AT1G72060

2mM Paraquat

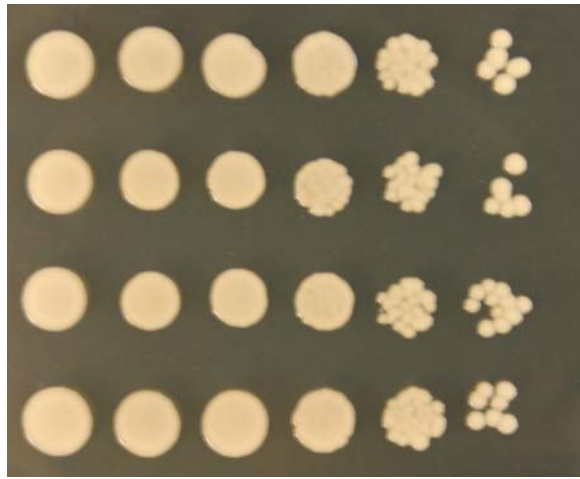

WT

Yap1 $\Delta$

AT3G10020

AT1G52200

Control

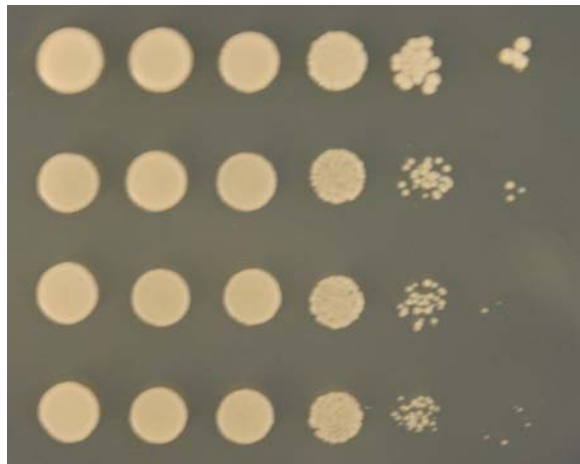

0.25 mM t-BOOH

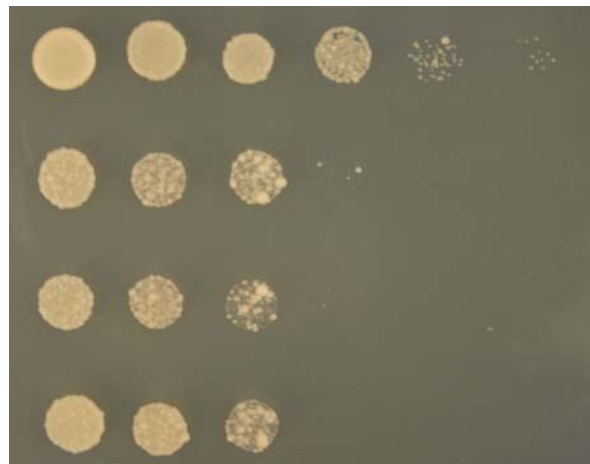

2mM Paraquat

WT

Yap1 $\Delta$

AT3G10020

AT1G52200

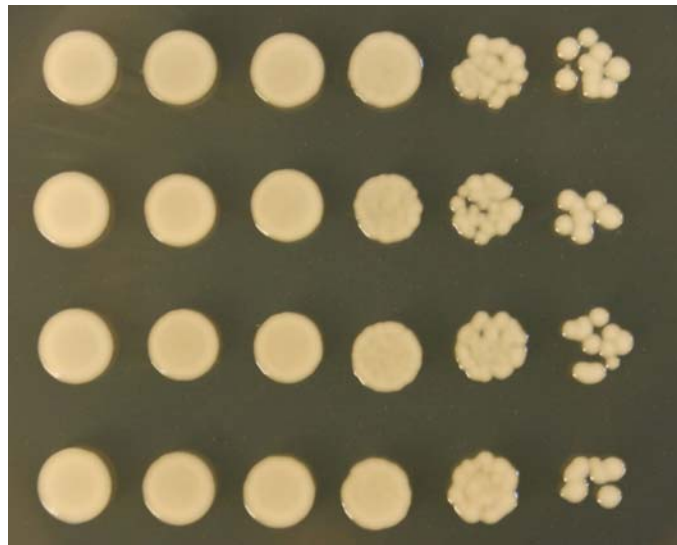

WT

Yap1Δ

AT1G78410

AT1G21520

Control

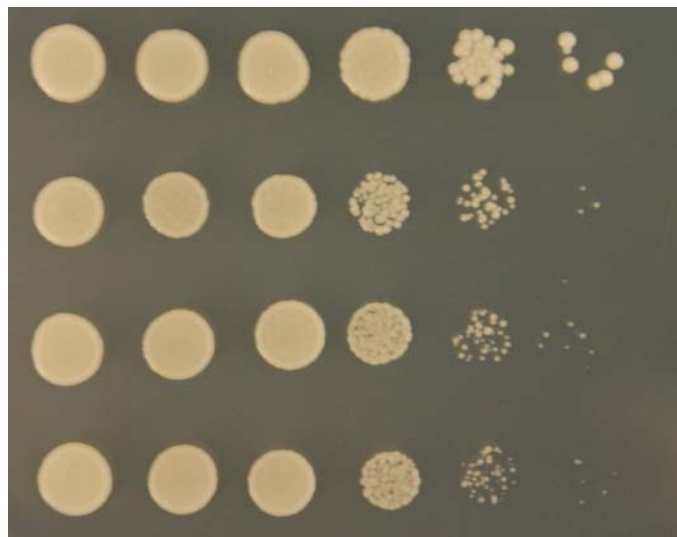

0.25 mM t-BOOH

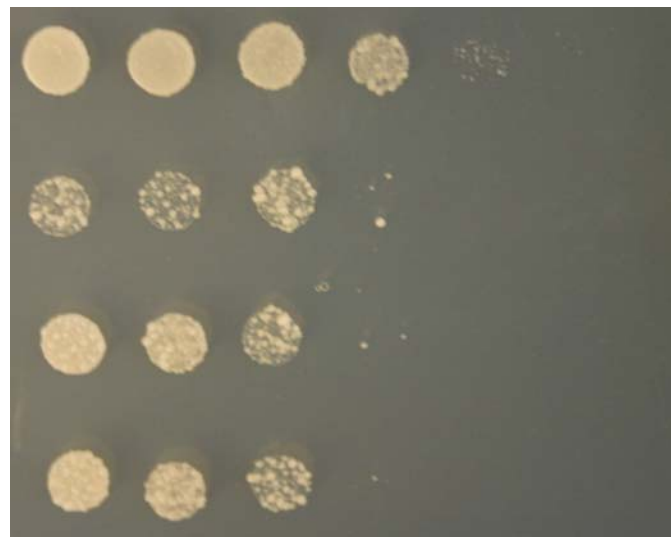

2mM Paraquat

WT

Yap1Δ

AT1G78410

AT1G21520

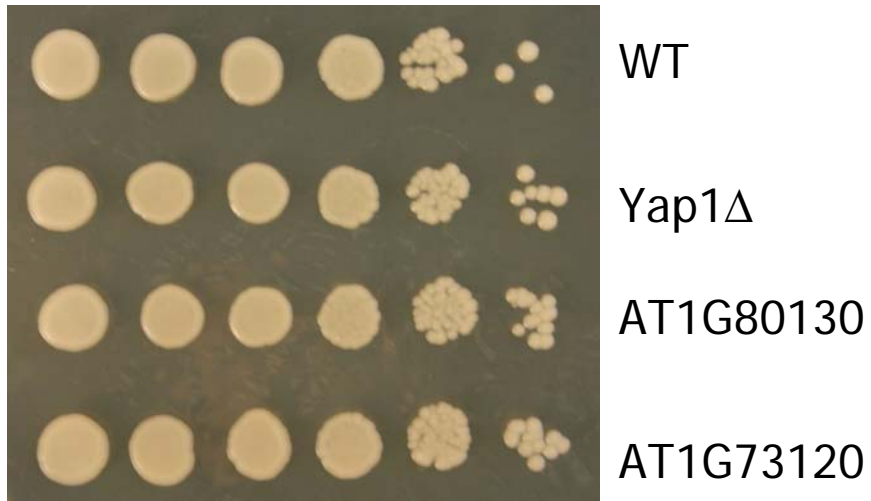

Control

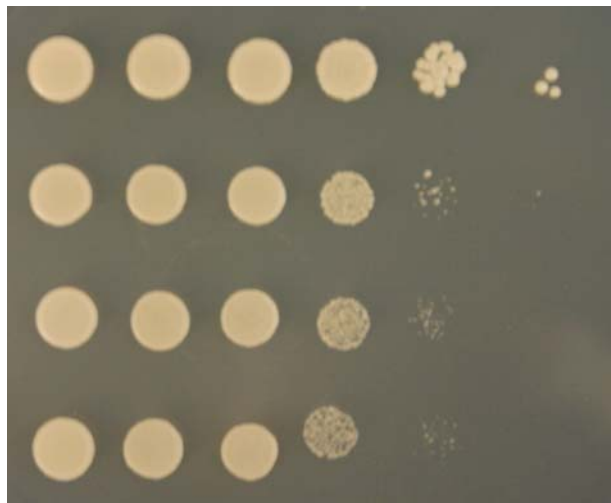

0.25 mM t-BOOH

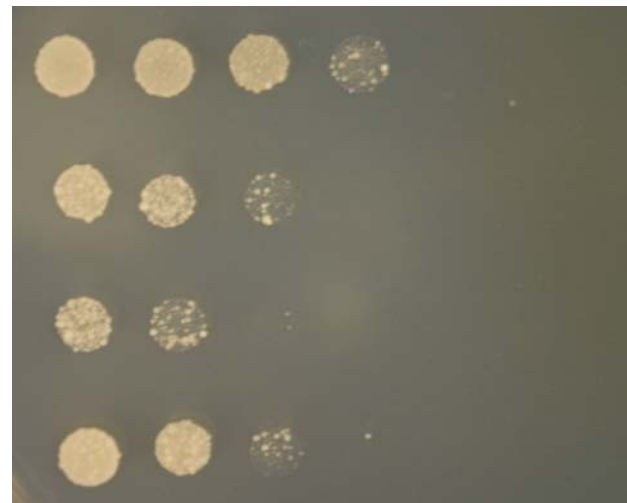

2mM Paraquat

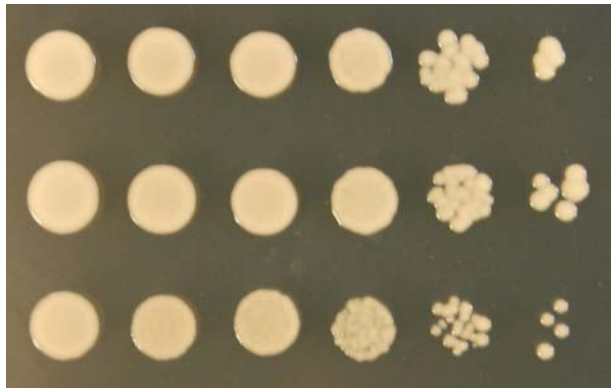

WT

Yap1Δ

AT1G50290

Control

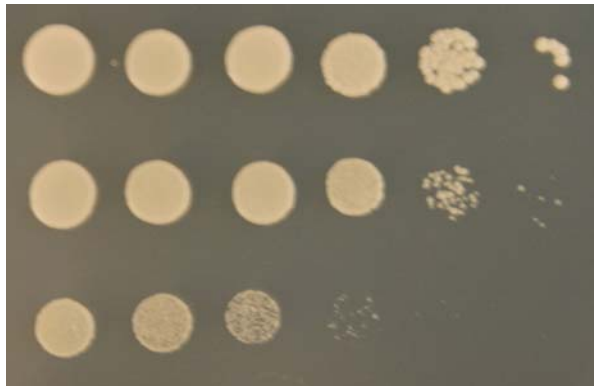

0.25 mM t-BOOH

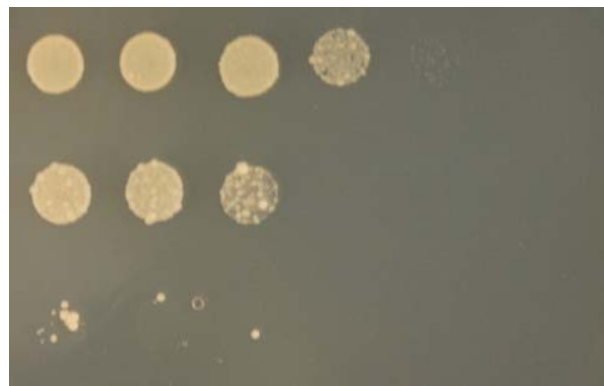

WT

Yap1Δ

AT1G50290

2mM Paraquat

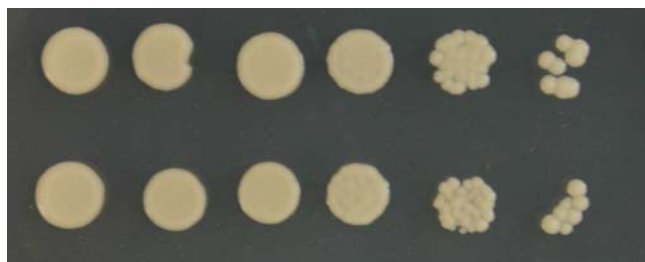

WT

Yap1 $\Delta$

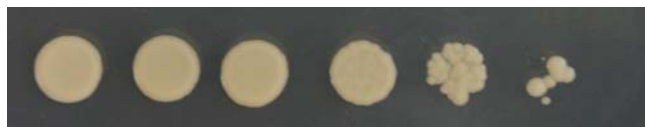

AT2G04795

Control

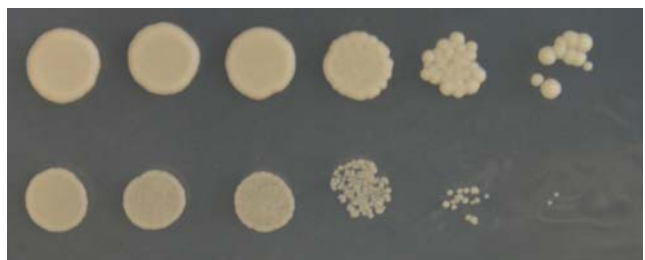

0.25 mM t-BOOH

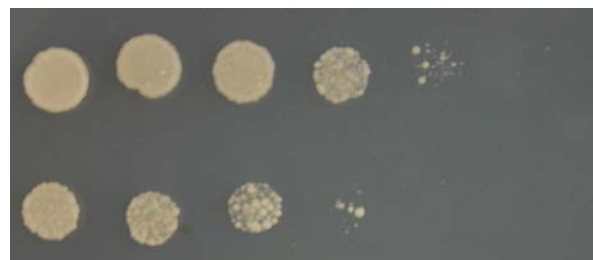

WT

Yap1 $\Delta$

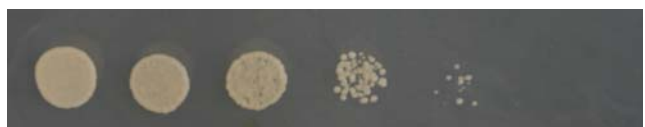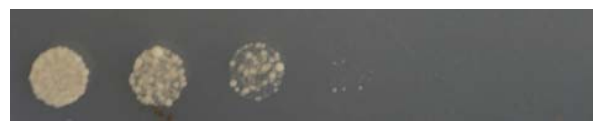

AT2G04795

2mM Paraquat

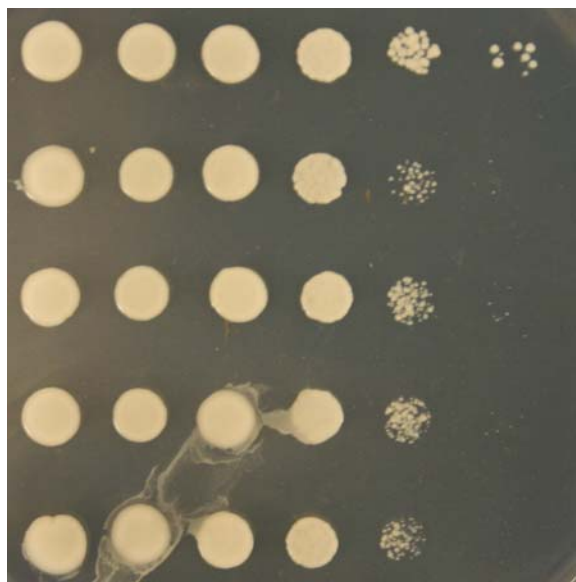

WT

Yap1 $\Delta$

AT1G27330

AT2G32210

AT1G63980

Control

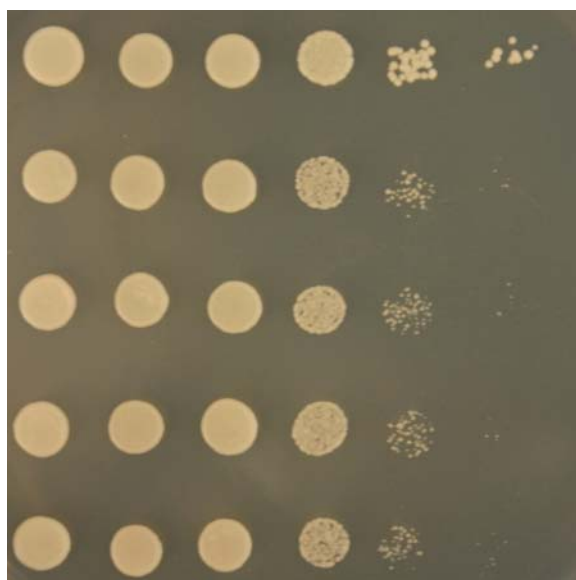

0.25 mM t-BOOH

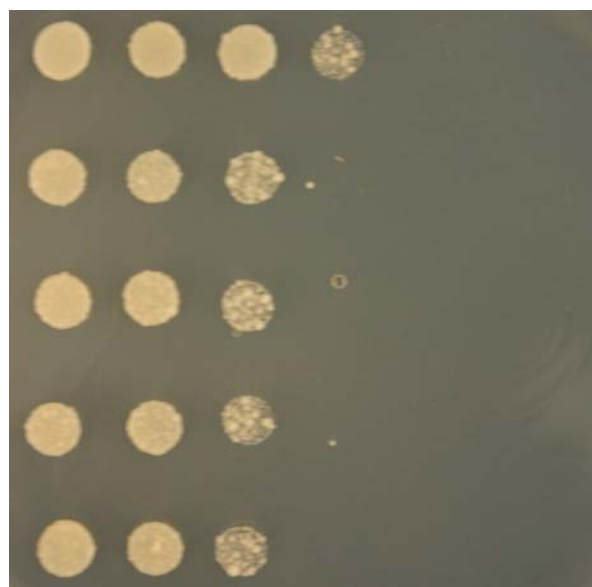

2mM Paraquat

WT

Yap1 $\Delta$

AT1G27330

AT2G32210

AT1G63980



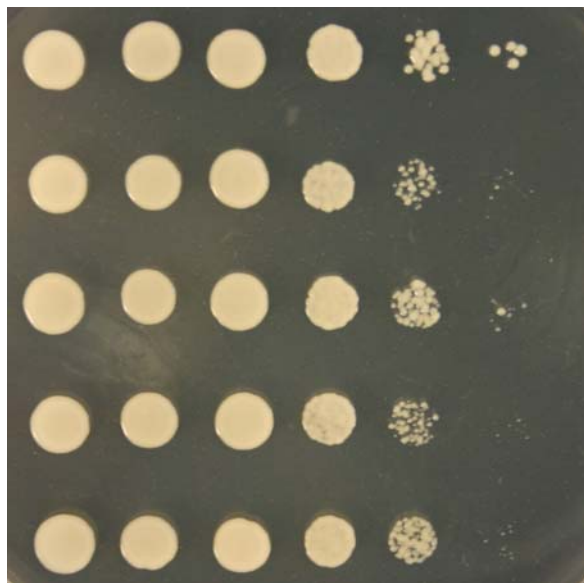

WT

Yap1Δ

AT2G19310

AT2G44240

AT2G40000

Control

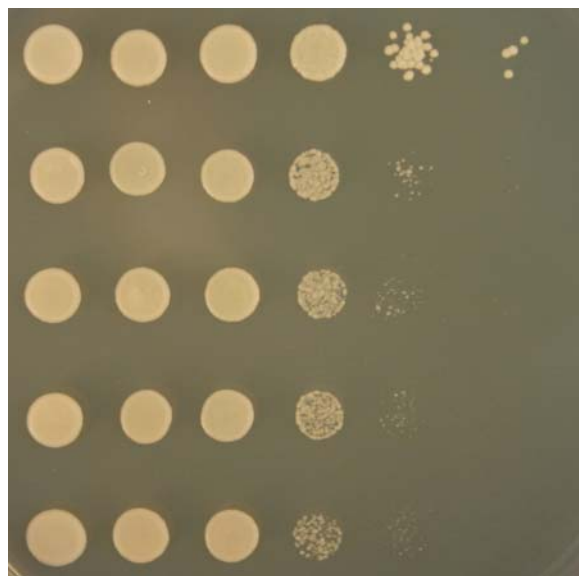

0.25 mM t-BOOH

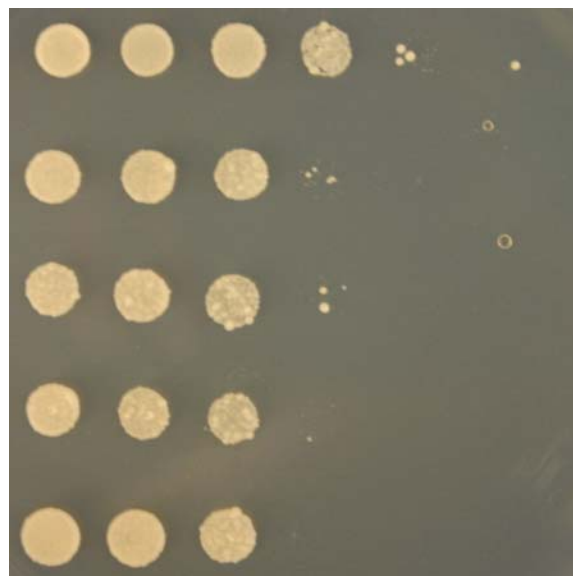

WT

Yap1Δ

AT2G19310

AT2G44240

AT2G40000

2mM Paraquat
